# Supplementary material for: Phytochemical Analysis of Pinus cembra Heartwood—UHPLC-DAD-ESI-MSn with Focus on Flavonoids, Stilbenes, Bibenzyls and Improved HPLC Separation
Source: MDPI journal article supplement (doi:10.3390/plants12193388), 2023-09-25
Supplement: s1 [file s1]

# Phytochemical Analysis of *Pinus cembra* Heartwood – UHPLC-DAD-ESI-MS<sup>n</sup> with Focus on Flavonoids, Stilbenes, Bibenzyls and Improved HPLC Separation

Fabian Alperth <sup>1</sup>, Anna Schneebauer <sup>1</sup>, Olaf Kunert <sup>2</sup> and Franz Bucar <sup>1,\*</sup>

<sup>1</sup> Institute of Pharmaceutical Sciences, Department of Pharmacognosy, University of Graz, Beethovenstraße 8, 8010 Graz, Austria; fabian.alperth@uni-graz.at; schneebauer.anna@gmail.com;

<sup>2</sup> Institute of Pharmaceutical Sciences, Department of Pharmaceutical Chemistry, University of Graz, Universitätsplatz 1, 8010 Graz, Austria; olaf.kunert@uni-graz.at

\* Correspondence: franz.bucar@uni-graz.at; Tel.: +43-316-380-5531

## Supplementary Materials

MS<sup>n</sup> results in ESI positive and negative mode are given in Tables S1 and S2, with threshold for listed fragment ions in MS<sup>n</sup> set as  $\geq 10\%$  relative intensity.

**Table S1.** Qualitative analysis of *Pinus cembra* heartwood ethanolic extract. MS<sup>n</sup> data in ESI positive mode.

| Nr. | RT [min] | Molecular Ion [m/z]    | MS <sup>n</sup> [m/z], Relative Intensity (%)                                                                                                                                                                  | Molecular Weight [g/mol] | Substance                          |
|-----|----------|------------------------|----------------------------------------------------------------------------------------------------------------------------------------------------------------------------------------------------------------|--------------------------|------------------------------------|
| 1   | 4.50     | 289 [M+H] <sup>+</sup> | MS <sup>2</sup> [289]: 271 (100), 243 (51), 195 (12), 153 (64)<br>MS <sup>3</sup> [271]: 243 (100)<br>MS <sup>4</sup> [243]: 215 (100), 149 (86)                                                               | 288                      | Aromadendrin                       |
| 2   | 6.82     | 271 [M+H] <sup>+</sup> | MS <sup>2</sup> [271]: 272 (10), 271 (100), 229 (26), 225 (14), 153 (81),<br>145 (11)<br>MS <sup>3</sup> [271]: 271 (100), 229 (24), 153 (64)                                                                  | 270                      | Apigenin                           |
| 3   | 6.83     | 273 [M+H] <sup>+</sup> | MS <sup>2</sup> [273]: 153 (100), 147 (85)<br>MS <sup>3</sup> [153]: 153 (100), 111 (23), 67 (42)<br>MS <sup>4</sup> [153]: 153 (100), 109 (19), 67 (28)                                                       | 272                      | Naringenin                         |
| 4   | 7.84     | 243 [M+H] <sup>+</sup> | MS <sup>2</sup> [243]: 225 (35), 211 (16), 197 (11), 159 (12), 149 (100),<br>147 (20), 145 (12), 133 (35), 121 (19), 119 (17)<br>MS <sup>3</sup> [149]: 121 (100)<br>MS <sup>4</sup> [121]: 121 (100), 93 (21) | 242                      | Pinostilbene                       |
| 5   | 8.50     | 215 [M+H] <sup>+</sup> | MS <sup>2</sup> [215]: 137 (95), 105 (100)<br>MS <sup>3</sup> [105]: 105 (100)<br>MS <sup>4</sup> [105]: 105 (100)                                                                                             | 214                      | Dihydropinosylvin                  |
| 6   | 8.56     | 213 [M+H] <sup>+</sup> | MS <sup>2</sup> [213]: 135 (100)<br>MS <sup>3</sup> [135]: 135 (10), 107 (100)<br>MS <sup>4</sup> [107]: 107 (100)                                                                                             | 212                      | Pinosylvin                         |
| 7   | 9.60     | 255 [M+H] <sup>+</sup> | MS <sup>2</sup> [255]: 256 (13), 255 (100), 213 (37), 209 (23), 187 (15),<br>153 (73), 129 (10)<br>MS <sup>3</sup> [255]: 255 (100), 214 (13), 213 (42), 209 (16), 153 (59)                                    | 254                      | Chrysin                            |
| 8   | 9.91     | 257 [M+H] <sup>+</sup> | MS <sup>2</sup> [257]: 215 (23), 179 (10), 173 (27), 153 (100), 131 (83)<br>MS <sup>3</sup> [153]: 153 (100), 111 (35), 109 (10), 67 (47)                                                                      | 256                      | Pinocembrin                        |
| 9   | 11.36    | 229 [M+H] <sup>+</sup> | MS <sup>2</sup> [229]: 151 (87), 137 (13), 105 (100)<br>MS <sup>3</sup> [105]: 105 (100)<br>MS <sup>4</sup> [105]: 105 (100)                                                                                   | 228                      | Dihydropinosylvin monomethyl ether |

|    |       |                        |                                                                                                                                                                                                                                                                                                                                                         |     |                                |
|----|-------|------------------------|---------------------------------------------------------------------------------------------------------------------------------------------------------------------------------------------------------------------------------------------------------------------------------------------------------------------------------------------------------|-----|--------------------------------|
| 10 | 11.36 | 227 [M+H] <sup>+</sup> | MS <sup>2</sup> [227]: 209 (14), 195 (13) 181 (16), 149 (100), 143 (30),<br>141 (12), 135 (17) 131 (34), 129 (24), 121 (12), 117 (45)<br>MS <sup>3</sup> [149]: 121 (100)<br>MS <sup>4</sup> [121]: 121 (100), 93 (15)                                                                                                                                  | 226 | Pinosylvin<br>monomethyl ether |
| 11 | 13.05 | 271 [M+H] <sup>+</sup> | MS <sup>2</sup> [271]: 173 (16), 167 (100), 131 (75)<br>MS <sup>3</sup> [167]: 167 (100), 127 (25), 123 (25), 67 (47)<br>MS <sup>4</sup> [167]: 167 (100), 127 (17), 123 (15), 67 (14)                                                                                                                                                                  | 270 | Pinostrobin                    |
| 12 | 13.05 | 269 [M+H] <sup>+</sup> | MS <sup>2</sup> [269]: 269 (43), 255 (19), 254 (100), 226 (20), 209 (18),<br>167 (21)<br>MS <sup>3</sup> [254]: 226 (100)<br>MS <sup>4</sup> [226]: 226 (10), 208 (49), 198 (66), 197 (100), 181<br>(96), 180 (37) 171 (97), 170 (67), 169 (26), 152 (15), 144<br>(13) 124 (17)                                                                         | 268 | Tectochrysin                   |
| 13 | 14.77 | 241 [M+H] <sup>+</sup> | MS <sup>2</sup> [241]: 223 (17), 213 (50), 209 (60), 181 (59), 149 (22),<br>143 (46), 141 (23), 137 (11), 129 (70), 117 (100), 113 (44)<br>111 (84), 91 (10)<br>MS <sup>3</sup> [117]: 117 (100)<br>MS <sup>4</sup> [117]: 117 (100)                                                                                                                    | 240 | Pinosylvin dimethyl<br>ether   |
| 14 | 18.24 | 279 [M+H] <sup>+</sup> | MS <sup>2</sup> [279]: 261 (100), 243 (36), 195 (10), 181 (11)<br>MS <sup>3</sup> [261]: 243 (100)<br>MS <sup>4</sup> [243]: 215 (34), 201 (45), 187 (88), 175 (11) 173 (100),<br>161 (37), 159 (52), 149 (11), 147 (25), 145 (38), 135 (16),<br>133 (17), 131 (34), 121 (18), 119 (10)                                                                 | 278 | Linolenic acid                 |
| 15 | 18.36 | 303 [M+H] <sup>+</sup> | MS <sup>2</sup> [303]: 285 (47), 257 (100), 123 (56)<br>MS <sup>3</sup> [257]: 229 (20), 215 (28), 201 (100), 187 (45), 175 (27),<br>173 (32), 163 (11), 161 (21), 159 (23), 149 (24), 147 (25),<br>145 (10), 135 (25), 133 (13), 123 (10), 109 (16)<br>MS <sup>4</sup> [201]: 173 (21), 159 (54), 145 (100), 131 (21), 119<br>(18), 107 (10), 105 (10) | 302 | Abietic acid                   |
| 16 | 19.29 | - <sup>1</sup>         | -                                                                                                                                                                                                                                                                                                                                                       | 280 | Linoleic acid                  |
| 17 | 20.78 | -                      | -                                                                                                                                                                                                                                                                                                                                                       | 282 | Oleic acid                     |

<sup>1</sup> No detection and/or fragmentation due to weak ionization in respective mode.

**Table S2.** Qualitative analysis of *Pinus cembra* heartwood ethanolic extract. MS<sup>n</sup> data in ESI negative mode.

| Nr. | RT<br>[min] | Molecular<br>Ion [m/z] | MS <sup>n</sup> [m/z], Relative Intensity (%)                                                                                                                                                                                                                               | Molecular<br>Weight [g/mol] | Substance    |
|-----|-------------|------------------------|-----------------------------------------------------------------------------------------------------------------------------------------------------------------------------------------------------------------------------------------------------------------------------|-----------------------------|--------------|
| 1   | 4.50        | 287 [M-H] <sup>-</sup> | MS <sup>2</sup> [287]: 259 (100), 243 (11)<br>MS <sup>3</sup> [259]: 241 (17), 215 (100), 173 (23), 172 (11), 165 (10),<br>151 (14), 125 (53)<br>MS <sup>4</sup> [215]: 200 (18), 173 (100), 172 (41), 158 (10)                                                             | 288                         | Aromadendrin |
| 2   | 6.82        | 269 [M-H] <sup>-</sup> | MS <sup>2</sup> [269]: 269 (15), 227 (15), 226 (12), 225 (100), 201 (25),<br>183 (15), 181 (11), 151 (18), 149 (36)<br>MS <sup>3</sup> [225]: 197 (40), 196 (20), 183 (38), 181 (100), 169 (14)<br>MS <sup>4</sup> [181]: 181 (100), 153 (25), 152 (30), 141 (11), 117 (15) | 270                         | Apigenin     |
| 3   | 6.83        | 271 [M-H] <sup>-</sup> | MS <sup>2</sup> [271]: 177 (21), 151 (100)<br>MS <sup>3</sup> [151]: 107 (100)<br>MS <sup>4</sup> [107]: 107 (53), 65 (100)                                                                                                                                                 | 272                         | Naringenin   |
| 4   | 7.84        | 241 [M-H] <sup>-</sup> | MS <sup>2</sup> [241]: 226 (100), 225 (97), 223 (10), 209 (12), 165 (17)<br>MS <sup>3</sup> [226]: 211 (15), 198 (100), 197 (47), 183 (29), 182<br>(24), 181 (52)                                                                                                           | 242                         | Pinostilbene |

|    |       |                        |                                                                                                                                                                                                                                                                |     |                                    |
|----|-------|------------------------|----------------------------------------------------------------------------------------------------------------------------------------------------------------------------------------------------------------------------------------------------------------|-----|------------------------------------|
| 5  | 8.50  | 213 [M-H] <sup>-</sup> | <sup>1</sup>                                                                                                                                                                                                                                                   | 214 | Dihydropinosylvin                  |
| 6  | 8.56  | 211 [M-H] <sup>-</sup> | MS <sup>2</sup> [211]: 169 (100), 167 (75), 165 (12)<br>MS <sup>3</sup> [169]: 169 (100), 141 (70), 127 (26)                                                                                                                                                   | 212 | Pinosylvin                         |
| 7  | 9.60  | 253 [M-H] <sup>-</sup> | MS <sup>2</sup> [253]: 253 (36), 211 (12), 210 (12), 209 (100), 181 (15), 180 (13)<br>MS <sup>3</sup> [209]: 209 (10), 181 (100), 180 (84), 167 (13), 165 (42), 153 (19)<br>MS <sup>4</sup> [181]: 181 (12), 153 (100), 139 (68)                               | 254 | Chrysin                            |
| 8  | 9.91  | 255 [M-H] <sup>-</sup> | MS <sup>2</sup> [255]: 213 (100), 211 (42), 187 (16), 151 (28)<br>MS <sup>3</sup> [213]: 185 (100), 169 (26), 145 (16)<br>MS <sup>4</sup> [185]: 185 (100), 157 (20), 143 (80), 141 (65), 129 (16), 117 (12)                                                   | 256 | Pinocembrin                        |
| 9  | 11.36 | 227 [M-H] <sup>-</sup> | -                                                                                                                                                                                                                                                              | 228 | Dihydropinosylvin monomethyl ether |
| 10 | 11.36 | 225 [M-H] <sup>-</sup> | -                                                                                                                                                                                                                                                              | 226 | Pinosylvin monomethyl ether        |
| 11 | 13.05 | 269 [M-H] <sup>-</sup> | MS <sup>2</sup> [269]: 254 (100), 251 (60), 236 (30), 226 (17), 225 (12), 165 (29)<br>MS <sup>3</sup> [254]: 226 (100), 225 (71), 177 (16), 163 (13)<br>MS <sup>4</sup> [226]: 198 (100), 197 (14), 183 (10), 181 (14), 122 (82)                               | 270 | Pinostrobin                        |
| 12 | 13.05 | 267 [M-H] <sup>-</sup> | -                                                                                                                                                                                                                                                              | 268 | Tectochrysin                       |
| 13 | 14.77 | -                      | -                                                                                                                                                                                                                                                              | 240 | Pinosylvin dimethyl ether          |
| 14 | 18.24 | 277 [M-H] <sup>-</sup> | MS <sup>2</sup> [277]: 259 (22), 233 (100)<br>MS <sup>3</sup> [233]: 191 (100), 179 (19), 177 (57)                                                                                                                                                             | 278 | Linolenic acid                     |
| 15 | 18.36 | 301 [M-H] <sup>-</sup> | MS <sup>2</sup> [301]: 301 (39), 286 (53), 283 (40), 273 (26), 257 (75), 255 (100), 233 (10), 200 (14), 89 (11)                                                                                                                                                | 302 | Abietic acid                       |
| 16 | 19.29 | 279 [M-H] <sup>-</sup> | MS <sup>2</sup> [279]: 261 (100)<br>MS <sup>3</sup> [261]: 259 (63), 243 (100), 233 (19), 219 (19), 165 (11), 95 (12), 83 (30)                                                                                                                                 | 280 | Linoleic acid                      |
| 17 | 20.78 | 281 [M-H] <sup>-</sup> | MS <sup>2</sup> [281]: 263 (100)<br>MS <sup>3</sup> [263]: 245 (100), 235 (52), 233 (13), 221 (20), 195 (12), 193 (14), 183 (25), 179 (22), 167 (14), 155 (31), 153 (14), 137 (26), 127 (14), 125 (19), 123 (12), 111 (12), 97 (45), 95 (23), 83 (57), 81 (13) | 282 | Oleic acid                         |

<sup>1</sup> No detection and/or fragmentation due to weak ionization in respective mode.

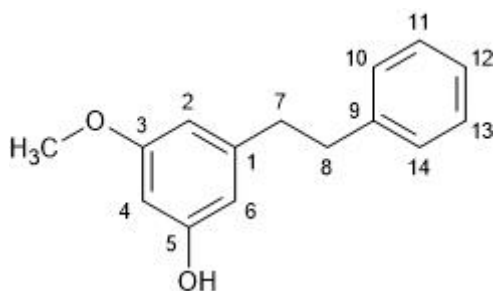

**Figure S1.** Structure of substance **9** Dihydropinosylvin monomethyl ether.

**Table S3.** NMR-data of substance **9** Dihydropinosylvin monomethyl ether in CDCl<sub>3</sub> (400 MHz).

| Position           | $\delta^{13}\text{C}$ [ppm], Type | $\delta^1\text{H}$ [ppm], Mult. <sup>1</sup> (J in Hz) |
|--------------------|-----------------------------------|--------------------------------------------------------|
| 1                  | 144.6, C                          | -                                                      |
| 2                  | 106.8, CH                         | 6.32, t (2.0)                                          |
| 3                  | 160.7, C                          | -                                                      |
| 3-OCH <sub>3</sub> | 55.3, CH <sub>3</sub>             | 3.72, s                                                |
| 4                  | 99.1, CH                          | 6.25, m                                                |
| 5                  | 156.5, C                          | -                                                      |
| 6                  | 108.1, CH                         | 6.25, m                                                |
| 7                  | 37.9, CH <sub>2</sub>             | 2.79 / 2.81, m                                         |
| 8                  | 37.5, CH <sub>2</sub>             | 2.86 / 2.88, m                                         |
| 9                  | 141.6, C                          | -                                                      |
| 10                 | 128.4, CH                         | 7.16, m                                                |
| 11                 | 128.4, CH                         | 7.27, t (7.5)                                          |
| 12                 | 126.0, CH                         | 7.18, m                                                |
| 13                 | 128.4, CH                         | 7.27, t (7.5)                                          |
| 14                 | 128.4, CH                         | 7.16, m                                                |

<sup>1</sup> s: singlet, d: doublet, t: triplet, m: multiplet.

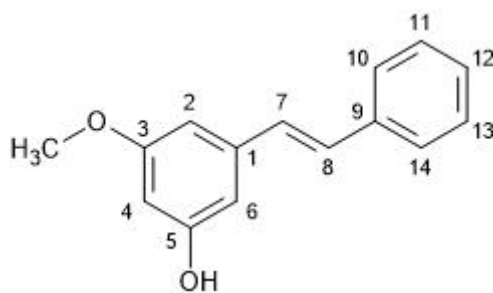

**Figure S2.** Structure of substance **10** Pinosylvin monomethyl ether.

**Table S4.** NMR-data of substance **10** Pinosylvin monomethyl ether in CDCl<sub>3</sub> (400 MHz).

| Position           | $\delta^{13}\text{C}$ [ppm], Type | $\delta^1\text{H}$ [ppm], Mult. <sup>1</sup> (J in Hz) |
|--------------------|-----------------------------------|--------------------------------------------------------|
| 1                  | 139.7, C                          | -                                                      |
| 2                  | 105.0, CH                         | 6.65, t (1.5)                                          |
| 3                  | 161.1, C                          | -                                                      |
| 3-OCH <sub>3</sub> | 55.4, CH <sub>3</sub>             | 3.82, s                                                |
| 4                  | 101.0, CH                         | 6.34, t (2.0)                                          |
| 5                  | 156.8, C                          | -                                                      |
| 6                  | 105.9, CH                         | 6.60, t (1.5)                                          |
| 7                  | 128.3, CH                         | 7.01, d (16.2)                                         |
| 8                  | 129.4, CH                         | 7.04, d (16.2)                                         |
| 9                  | 137.0, C                          | -                                                      |
| 10                 | 126.6, CH                         | 7.49, d (7.5)                                          |
| 11                 | 128.7, CH                         | 7.35, t (7.5)                                          |
| 12                 | 127.8, CH                         | 7.26, t (7.5)                                          |
| 13                 | 128.7, CH                         | 7.35, t (7.5)                                          |
| 14                 | 126.6, CH                         | 7.49, d (7.5)                                          |

<sup>1</sup> s: singlet, d: doublet, t: triplet.

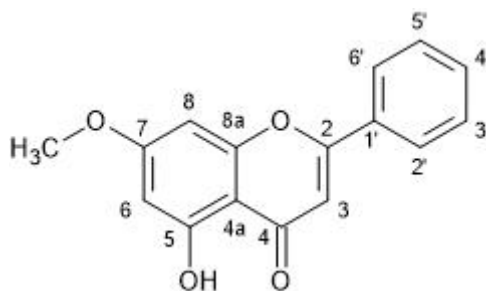

**Figure S3.** Structure of substance **12** Tectochrysin.

**Table S5.** NMR-data of substance **12** Tectochrysin in pyridin- $d_5$  (700 MHz).

| Position           | $\delta^{13}\text{C}$ [ppm], Type | $\delta^1\text{H}$ [ppm], Mult. <sup>1</sup> (J in Hz) |
|--------------------|-----------------------------------|--------------------------------------------------------|
| 2                  | 164.1, C                          | -                                                      |
| 3                  | 106.3, CH                         | 7.02, s                                                |
| 4                  | 182.9, C                          | -                                                      |
| 4a                 | 106.1, C                          | -                                                      |
| 5                  | 162.7, C                          | -                                                      |
| 6                  | 98.9, CH                          | 6.63, brs                                              |
| 7                  | 166.2, C                          | -                                                      |
| 7-OCH <sub>3</sub> | 56.0, CH <sub>3</sub>             | 3.79, s                                                |
| 8                  | 93.0, CH                          | 6.73, br                                               |
| 8a                 | 158.2, C                          | -                                                      |
| 1'                 | 131.7, C                          | -                                                      |
| 2'                 | 126.8, CH                         | 7.95, d (7.6)                                          |
| 3'                 | 129.4, CH                         | 7.49, m                                                |
| 4'                 | 132.2, CH                         | 7.51, m                                                |
| 5'                 | 129.4, CH                         | 7.49, m                                                |
| 6'                 | 126.8, CH                         | 7.95, d (7.6)                                          |

<sup>1</sup> s: singlet, brs: broad singlet, d: doublet, m: multiplet, br: broad signal.

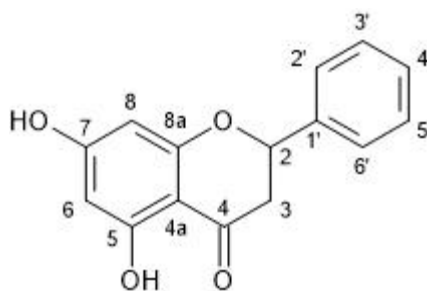

**Figure S4.** Structure of substance 8 Pinocembrin.

**Table S6.** NMR-data of substance 8 Pinocembrin in pyridin- $d_5$  (700 MHz).

| Position | $\delta^{13}\text{C}$ [ppm], Type | $\delta^1\text{H}$ [ppm], Mult. <sup>1</sup> (J in Hz) |
|----------|-----------------------------------|--------------------------------------------------------|
| 2        | 79.6, CH                          | 5.52, dd (12.8, 2.9)                                   |
| 3        | 43.4, CH <sub>2</sub>             | 3.21 dd (16.8, 12.8) /<br>2.90 dd (16.8, 2.9)          |
| 4        | 196.0, C                          | -                                                      |
| 4a       | 102.9, C                          | -                                                      |
| 5        | 165.2, C                          | -                                                      |
| 6        | 97.4, CH                          | 6.49, brs                                              |
| 7        | 168.7, C                          | -                                                      |
| 8        | 96.2, CH                          | 6.41, brs                                              |
| 8a       | 163.8, C                          | -                                                      |
| 1'       | 139.5, C                          | -                                                      |
| 2'       | 126.9, CH                         | 7.58, d (7.8)                                          |
| 3'       | 129.1, CH                         | 7.41, t (7.6)                                          |
| 4'       | 129.0, CH                         | 7.36, t (7.4)                                          |
| 5'       | 129.1, CH                         | 7.41, t (7.6)                                          |
| 6'       | 126.9, CH                         | 7.58, d (7.8)                                          |

<sup>1</sup> brs: broad singlet, d: doublet, dd: doublet of doublets, t: triplet.

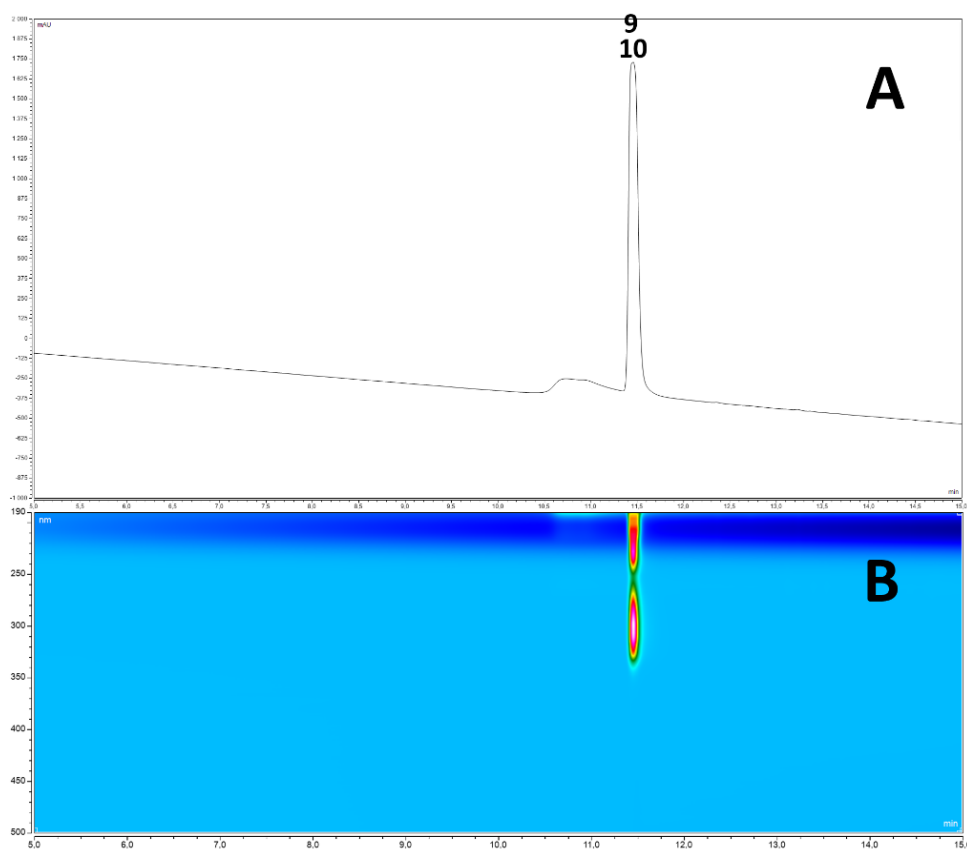

**Figure S5.** HPLC chromatogram (5-15 min) of a mixture of **9** and **10**, gradient elution (20-100 % B), column EclC18; A: 210 nm, B: 3D field (190-500 nm).

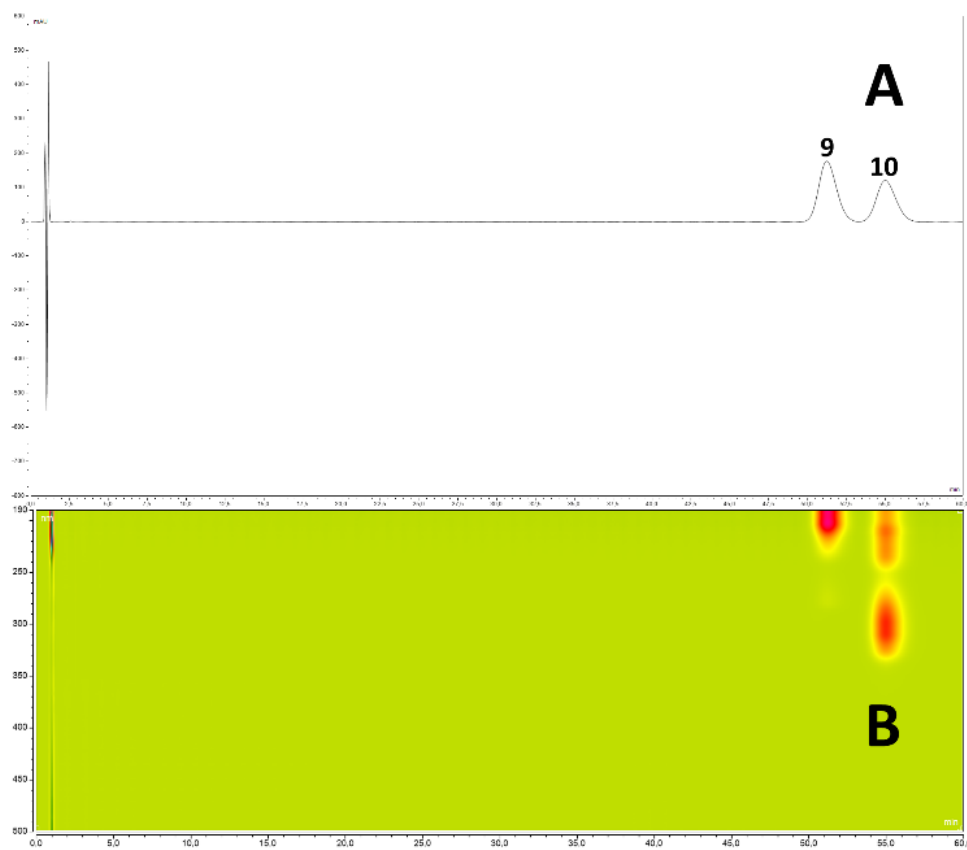

**Figure S6.** HPLC chromatogram of a mixture of **9** and **10**, isocratic elution (30 % B), column EclC18; A: 210 nm, B: 3D field (190-500 nm).



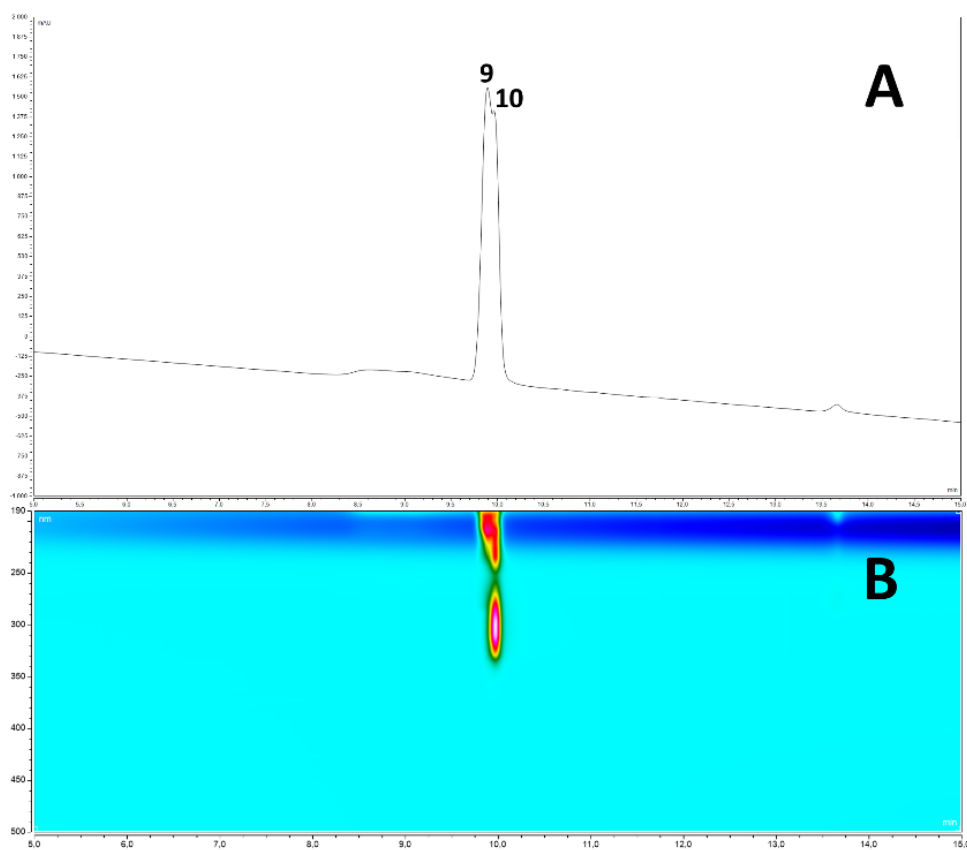

**Figure S7.** HPLC chromatogram (5-15 min) of a mixture of **9** and **10**, gradient elution (20-100 % B), column KtxC18; A: 210 nm, B: 3D field (190-500 nm).

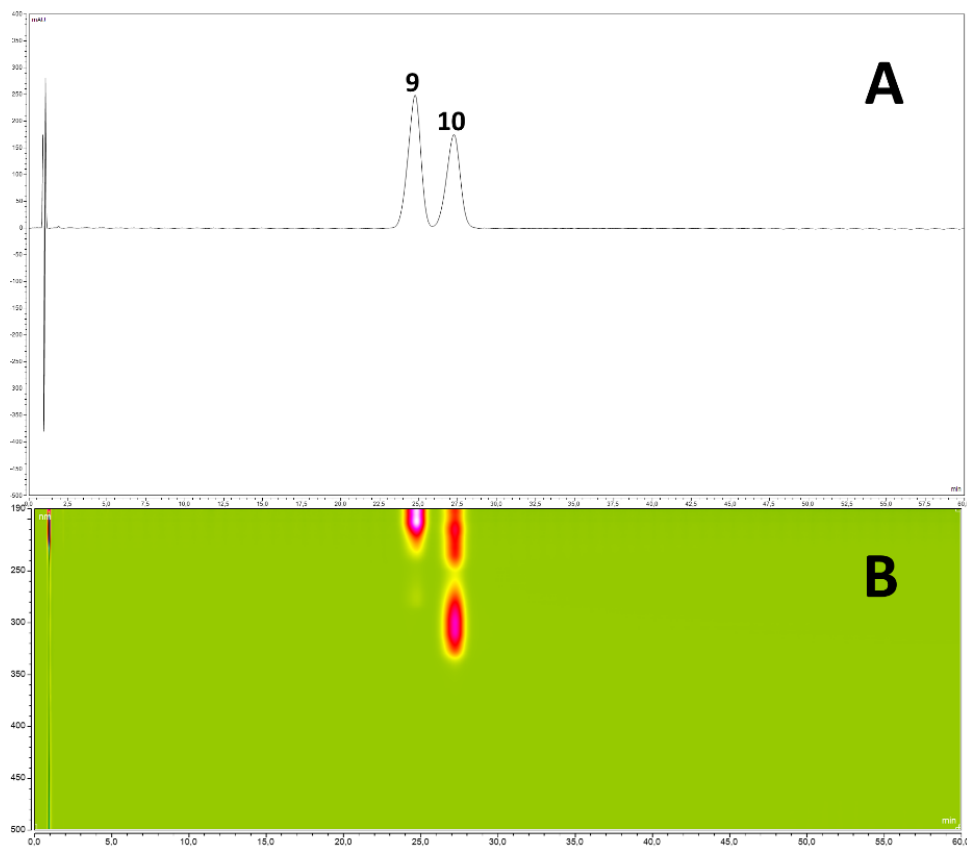

**Figure S8.** HPLC chromatogram of a mixture of **9** and **10**, isocratic elution (30 % B), column KtxC18; A: 210 nm, B: 3D field (190-500 nm).

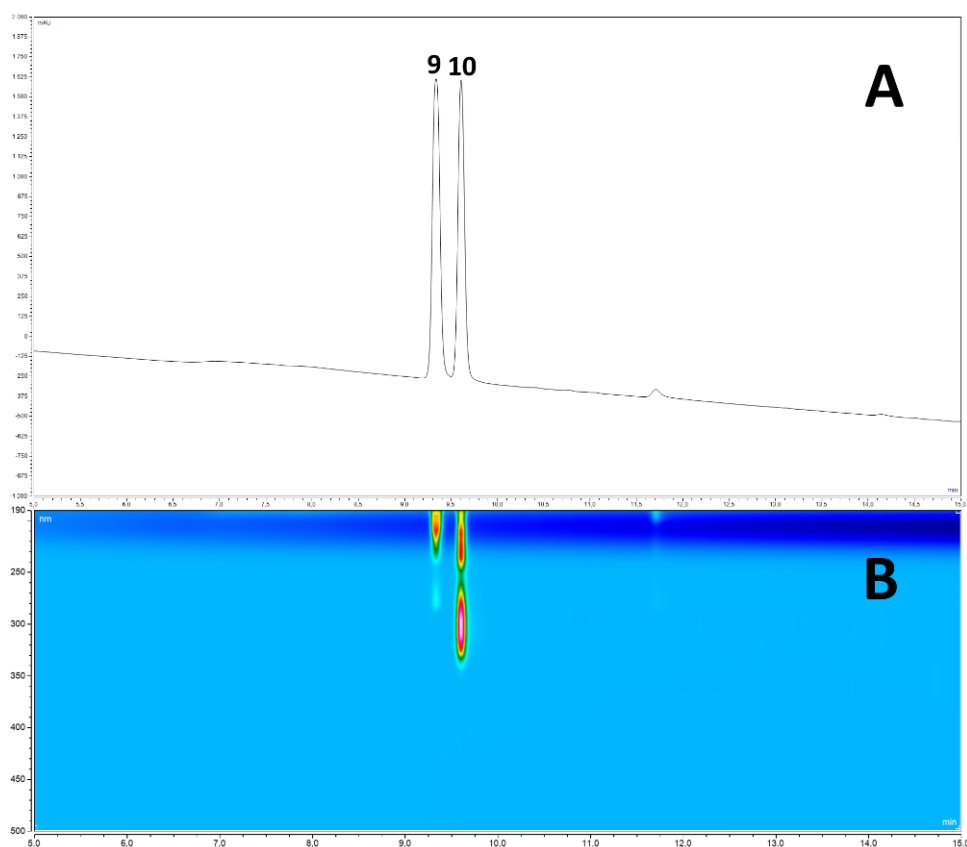

**Figure S9.** HPLC chromatogram (5-15 min) of a mixture of **9** and **10**, gradient elution (20-100 % B), column KtxPFP; A: 210 nm, B: 3D field (190-500 nm).

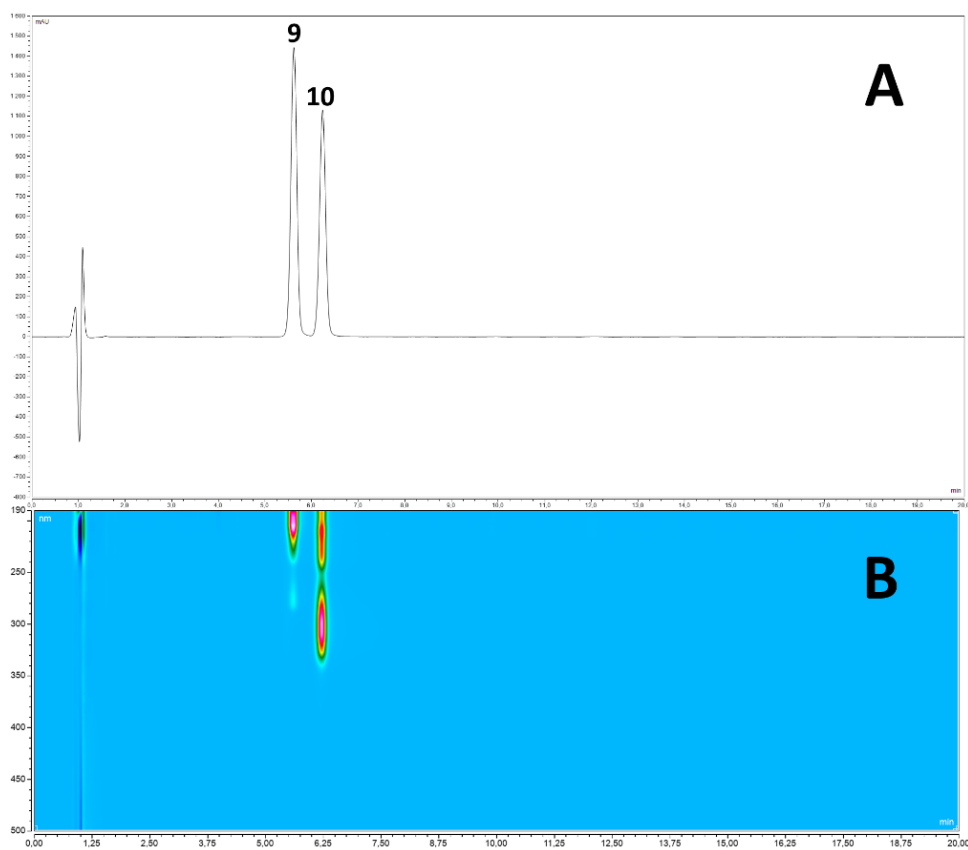

**Figure S10.** HPLC chromatogram of a mixture of **9** and **10**, isocratic elution (40 % B), column KtxPFP; A: 210 nm, B: 3D field (190-500 nm).

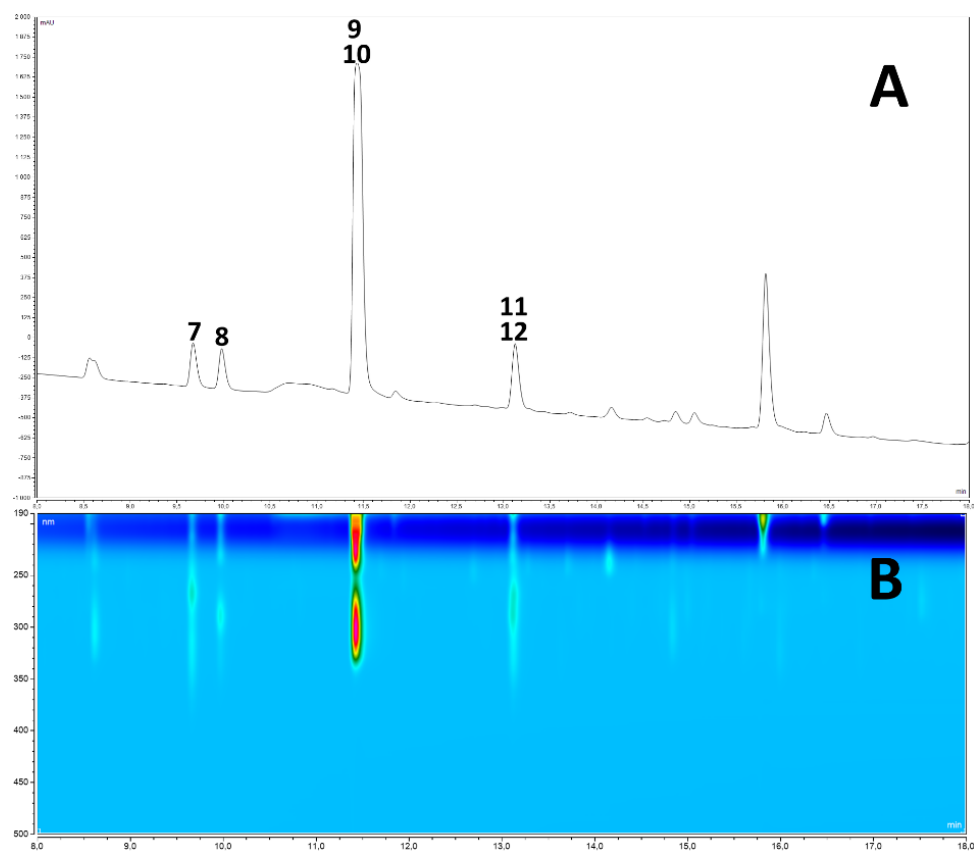

**Figure S11.** HPLC chromatogram (8-18 min) of a *Pinus cembra* heartwood ethanolic extract, gradient elution (20-100 % B), column EclC18; A: 210 nm, B: 3D field (190-500 nm).

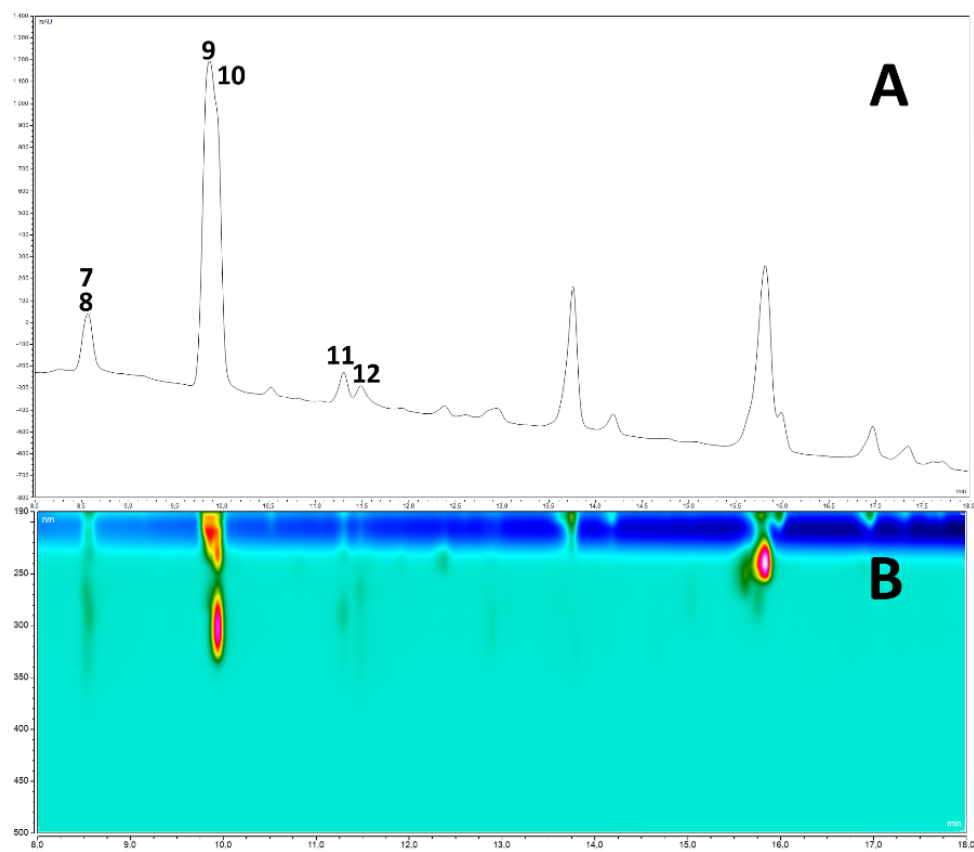

**Figure S12.** HPLC chromatogram (8-18 min) of a *Pinus cembra* heartwood ethanolic extract, gradient elution (20-100 % B), column KtxC18; A: 210 nm, B: 3D field (190-500 nm).

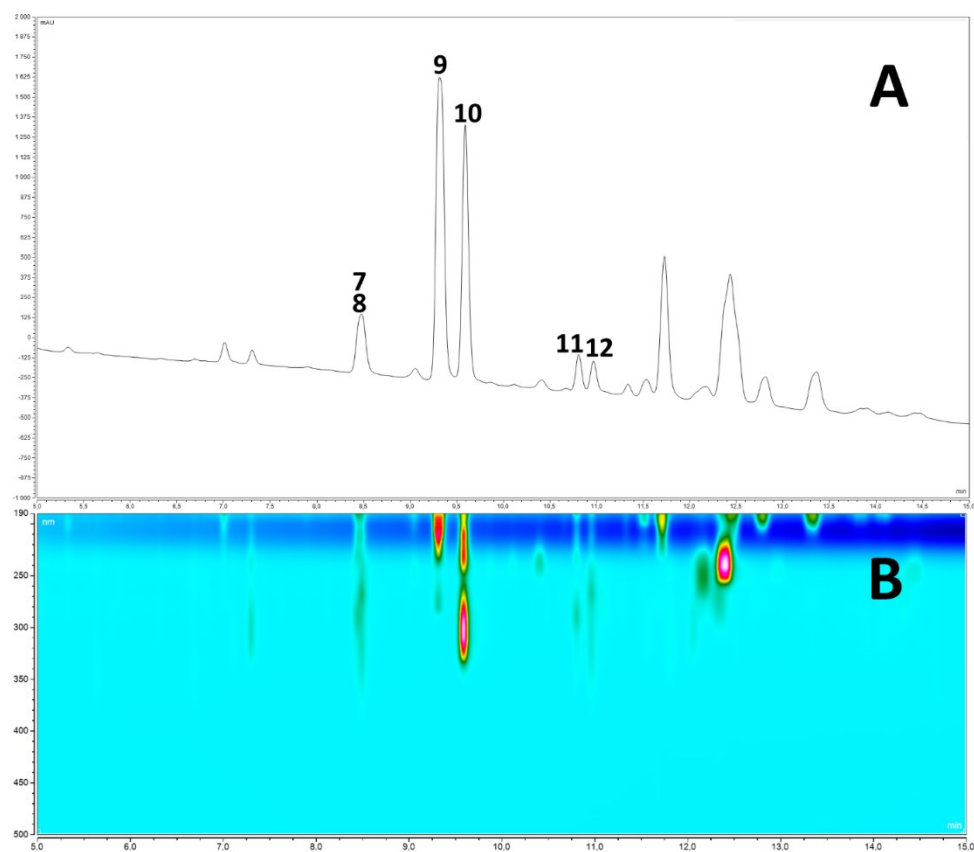

**Figure S13.** HPLC chromatogram (5-15 min) of a *Pinus cembra* heartwood ethanolic extract, gradient elution (20-100 % B), column KtxPFP; A: 210 nm, B: 3D field (190-500 nm).
